# Supplementary material
Source: Elsevier journal article supplement (https://www.sciencedirect.com/science/article/pii/S260364792100035X)
Supplement: mmc1 [file S260364792100035X:mmc1.docx]

**CUESTIONARIO MODULAR (MRF-2*)**

Identificación de Eventos Adversos mediante Revisión Retrospectiva de **Historias Clínicas con Cribado Positivo**

***** Basado en “Modular Review Form for Retrospective Case Record Review”.

Clinical Safety Research Unit. Imperial College, London.

**INSTRUCCIONES:**

- **Este cuestionario debe cumplimentarse de forma diferente según la secuencia y los criterios indicados en el MANUAL OPERATIVO:**
- **Es posible** (y deseable) **recoger la información de varios incidentes y eventos adversos (EA) en el mismo paciente:** emplee **1 Formulario MRF-2 para cada EA** identificado.
- **La secuencia de recogida de datos para cada EA identificado es:**

**
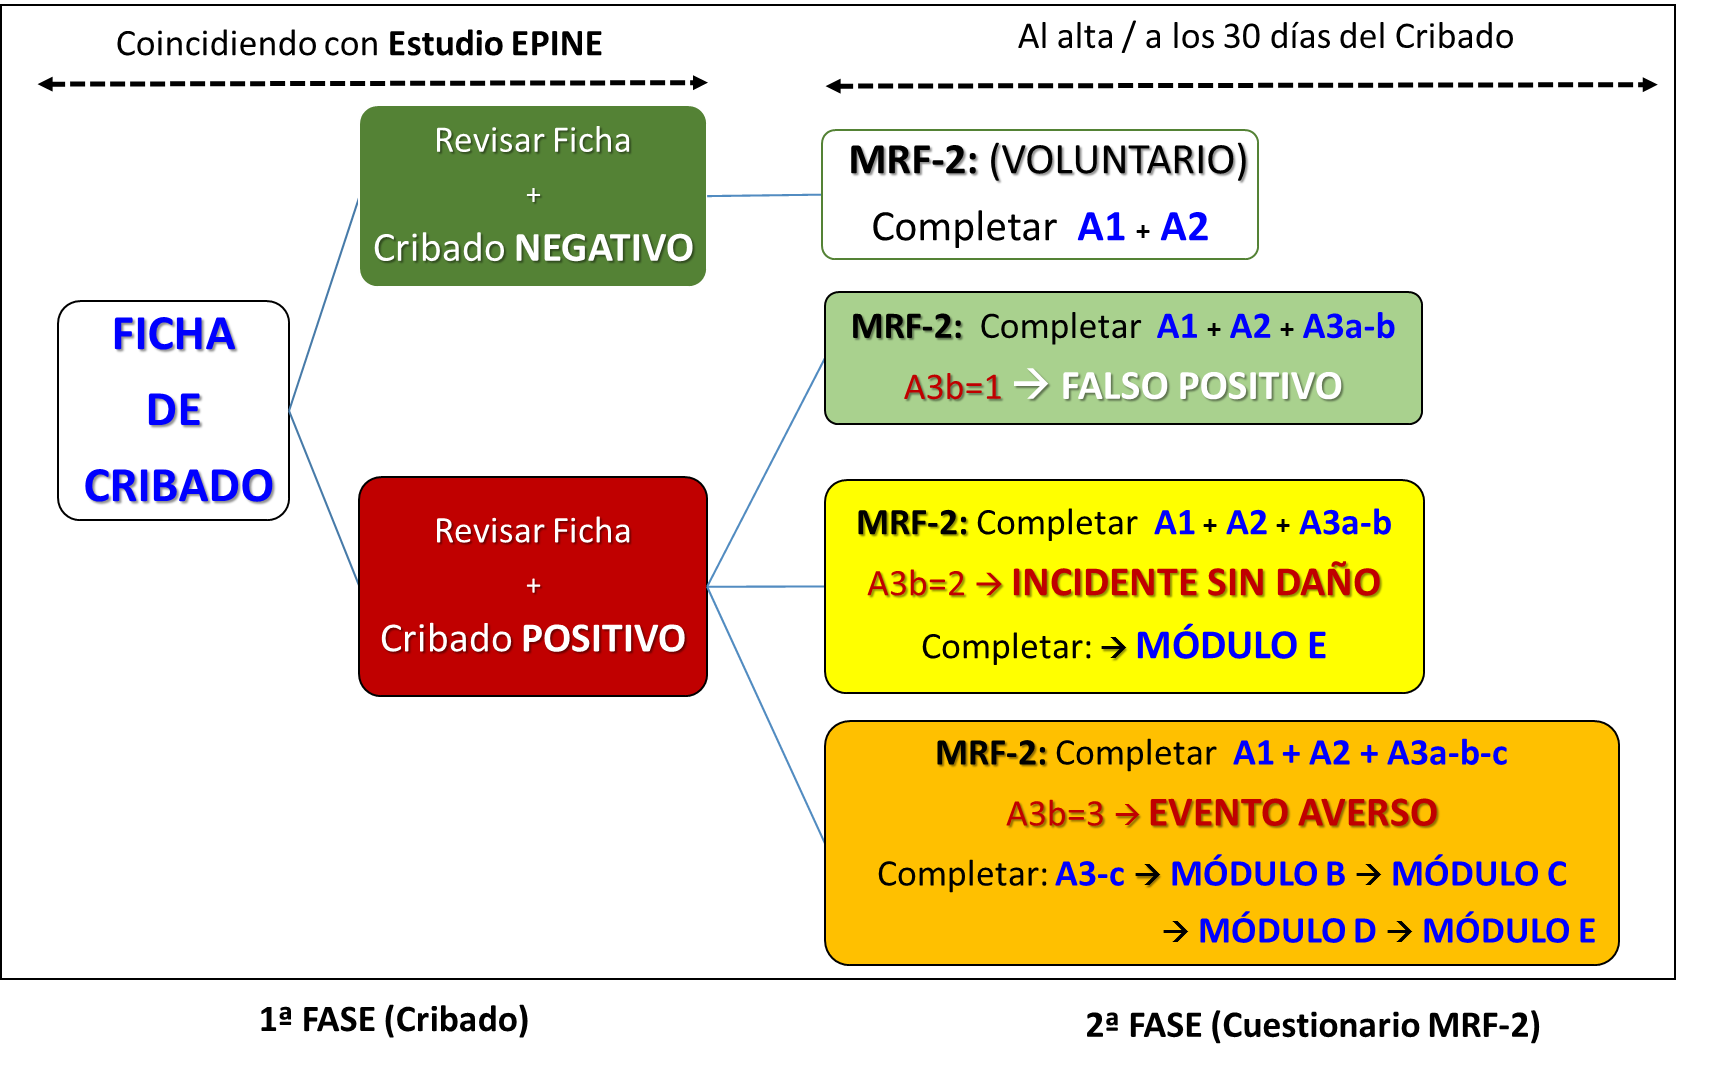
**

1. **Complete íntegramente el MÓDULO A:** Información del paciente y antecedentes (Páginas 2 y 3)
2. **En incidentes (sin daño)**, pase directamente al punto 5 (**Módulo E**). **En cambio, si se confirma lesión, complete el MÓDULO B** La lesión y sus efectos (Pág. 4).
3. **Complete los apartados relevantes del MÓDULO C (identificados en A7)**

Periodo de hospitalización durante el cual ocurrió el EA (Páginas 5 y 6)

1. **Complete los apartados relevantes del MÓDULO D (identificados en modulo C)**

Principales problemas en el proceso de asistencia (Páginas de la 7 a la 13)

1. **Complete íntegramente el MÓDULO E**

Factores causales y posibilidad de prevención (Página 14)

**Por favor, escriba las respuestas de forma clara y legible.**

**Una vez completado el formulario, entréguelo al coordinador del estudio en su hospital**

**RECUERDE, LA INFORMACIÓN RECOGIDA ES CONFIDENCIAL Y DEBE ASEGURARSE SU CUSTODIA ADECUADA**

**A1.- INFORMACIÓN DEL CASO:**

| **Nº de Caso** ESHMAD: | |  | (*anotar nº asignado en Web al transcribir ficha*) |
| --- | --- | --- | --- |
|  |  |  |  |
| ID **Revisor** MRF-2: |  |  |  |
|  |  |  |  |
| **Fecha Revisión** MRF2: |  |  | (*dd-mm-aaaa*) |
|  |  |  |  |
| Fecha de **Alta:** |  |  | (*dd-mm-aaaa*) |
|  |  |  |  |
| **Destino** al alta |  | **1.** Atención Primaria | |
|  | **2.** Centro de especialidades | |
|  | **3.** Otro Servicio | |
|  | **4.** Otro Hospital | |
|  | **5.** Alta voluntaria / Fugado | |
|  | **6.** Exitus | |

**A2.- PRONÓSTICO DE LA ENFERMEDAD PRINCIPAL**

**Resultado esperable** del proceso que provocó el ingreso.

| **A:** Recuperación completa al  estado de salud basal del paciente | | | | | | | **B:** Recuperación con  invalidez residual | | | | | | | **C:** Enfermedad terminal | | | | | | |
| --- | --- | --- | --- | --- | --- | --- | --- | --- | --- | --- | --- | --- | --- | --- | --- | --- | --- | --- | --- | --- |
|  | | |  | **Sí** |  | **No** |  | | |  | **Sí** |  | **No** |  | | |  | **Sí** |  | **No** |
| Si la respuesta es afirmativa,  la recuperación completa es: | | | | | | | Si la respuesta es afirmativa,  la incapacidad es: | | | | | | | Si la respuesta es afirmativa,  el pronóstico es: | | | | | | |
|  |  | 1 Muy Probable | | | | |  |  | 1 No-progresiva | | | | |  |  | 1 Probablemente muera en este ingreso  ingreingreso ngreso admisión | | | | |
|  |  | 2 Probable | | | | |  |  | 2 Lentamente progresiva | | | | |  |  | 2 Probablemente muera en tres meses | | | | |
|  |  | 3 Poco Probable | | | | |  |  | 3 Rápidamente progresiva | | | | |  |  | 3 Espera sobrevivir >3 meses | | | | |
|  |  | 4 Improbable | | | | |  | | | | | | |  | | | | | | |
|  |

| **0** | **1** | **2** | **3** | **4** | **5** | **6** | **7** | **8** | **9** | **10** |
| --- | --- | --- | --- | --- | --- | --- | --- | --- | --- | --- |

**Índice de Charlson:**

**A3.- PRINCIPALES CARACTERÍSTICAS DEL SUCESO**

**A3a**) **SUCESO**

| **Describa el SUCESO:** |  | |
| --- | --- | --- |
|  | | |
| **Fecha de ocurrencia:** |  | (*dd-mm-aaaa*) |

**A3b**) **EL SUCESO PRODUJO**:

|  | **1.** Es un FALSO POSITIVO de la Guía de Cribado / No cumple con los criterios de inclusión. 🡺***FIN*** *MRF2* |
| --- | --- |
|  |  |
|  | **2.** Suceso sin lesión (p.e. caída del enfermo sin consecuencias). 🡺 *PASAR A* ***MÓDULO E*** |
|  |  |
|  | **3.** Alguna lesión o complicación 🡺*CONTINUAR* ***MÓDULO A*** *(A3c, A4, A5)* |
|  |  |

**A3c) CAUSA DE LA LESIÓN**

Ayuda a la decisión:

| *¿Si el paciente se hubiera quedado en casa, le habría pasado lo mismo?* |
| --- |
| *¿Los factores de riesgo del paciente justifican lo que ha ocurrido?* |
| *¿A otro paciente con características similares le habría ocurrido lo mismo?* |

Después de considerar los detalles clínicos del paciente, *independientemente de la posibilidad de prevención*, **¿cómo de seguro está de que LA ASISTENCIA SANITARIA ES LA CAUSANTE DE LA LESIÓN? Valore la presencia de factores de riesgo y su comorbilidad en la GC.**

|  | 1 Ausencia de evidencia de que el efecto adverso se deba al manejo del paciente.🡺***FIN*** *MRF2* | |
| --- | --- | --- |
|  | La lesión se debe enteramente a la patología del paciente | |
|  | 2 Mínima probabilidad de que el manejo fuera la causa. | 🡺*CONTINUAR* ***MÓDULO A*** |
|  | 3 Ligera probabilidad de que el manejo fuera la causa. |
|  | 4 Moderada probabilidad de que el manejo fuera la causa. |
|  | 5 Es muy probable de que el manejo fuera la causa |
|  | 6 Total evidencia de que el manejo fuera la causa del efecto adverso |

**A4.- CONSECUENCIAS DEL EA EN EL PACIENTE**

Marque el EA según proceda **(**marque **sólo 1 casilla)**

| **Complicaciones de los cuidados** | | **Infección relacionada con la asistencia** | |
| --- | --- | --- | --- |
|  | Úlcera por presión |  | Infección de sitio quirúrgico o de herida traumática |
|  | Quemaduras o erosiones |  | Infección del tracto urinario |
|  | Caídas y fracturas consecuentes |  | Bacteriemia asociada a dispositivo |
|  | EAP e Insuficiencia respiratoria |  | Sepsis o shock séptico |
|  | Otras consecuencias de inmovilización prolongada |  | Neumonía (incluye por aspiración) |
|  | Flebitis |  | Infección de úlcera por presión |
|  | Otros ________________________________ |  | Colonización / infección por MOMR |
| **Efectos de la medicación o productos sanitarios** | |  | Infección oportunista |
|  | Nauseas, vómitos o diarrea |  | Otros ________________________________________ |
|  | Prurito, rash y otras manifestaciones alérgicas | **Complicaciones de un procedimiento** | |
|  | Reacción cutánea por contacto |  | Hemorragia o hematoma |
|  | Ulcus o hemorragia digestiva alta |  | Lesión en un órgano |
|  | Alteraciones neurológicas |  | Neumotórax |
|  | Estupor o desorientación |  | Hematuria |
|  | Cefalea |  | Perforación timpánica |
|  | Glucemia alterada |  | Desgarro uterino |
|  | Hepatotoxicidad |  | Trastorno circulatorio (férula muy ajustada) |
|  | Hemorragia, epistaxis, hematomas |  | Eventración o evisceración |
|  | IAM, AVC, TEP, TVP |  | Deshicencia de suturas |
|  | Insuficiencia cardiaca y shock |  | Seroma |
|  | Agravamiento de la función renal |  | Adherencias y alteraciones funcionales |
|  | Alteración del ritmo cardíaco o actividad eléctrica |  | Complicaciones neonatales por parto |
|  | Desequilibrio de electrolitos |  | Complicaciones locales por radioterapia |
|  | Hipotensión |  | Otros ________________________________________ |
|  | Neutropenia | **Otros** | |
|  | Retención urinaria (anestesia) |  | Peor curso evolutivo de la patología principal |
|  | Dolor (analgesia poco efectiva) |  | Pendiente de especificar |
|  | Otros ________________________________ |  | Otros ________________________________________ |

**Especifique en qué proceso de la asistencia ocurrió el evento (**marque **sólo 1 casilla)**

Esto identificará el apartado del módulo C que deberá completar

|  | **C0**. Cuidados en un proceso previo a la admisión a estudio |
| --- | --- |
|  | **C1**. Cuidados en el proceso de admisión (incluye valoración preoperatoria y valoración previa en Urgencias) |
|  | **C2**. Cuidados durante un procedimiento |
|  | **C3**. Cuidados postoperatorios o posteriores al procedimiento, Reanimación o Cuidados Intensivos |
|  | **C4**. Cuidados en sala |
|  | **C5**. Valoración al final de la admisión a estudio y cuidados al alta. |

**A5.- ADECUACIÓN DE LOS INFORMES PARA JUZGAR EL EA**

**¿La Historia clínica proporciona la información suficiente para valorar el EA?**

|  | 1 No, el EA pasa desapercibido en la HC |
| --- | --- |
|  | 2 No, la información para juzgar el EA está incompleta o es poco adecuada |
|  | 3 Sí, hay suficiente información para identificar el EA |
|  | 4 Sí, es fácil identificar los factores contribuyentes, el impacto y la evitabilidad del EA |

🡺 *CONTINUAR EN* ***MÓDULO B***

**B1.- INVALIDEZ CAUSADA POR EL EA**

**Describa el impacto del EA en el paciente** (ej. aumento del dolor y del sufrimiento durante x días, retraso en la recuperación de la enfermedad primaria; al paciente no se le ha proporcionado una asistencia y apoyo adecuados; contribuyo o causó la muerte del paciente, etc.)

|  |
| --- |

| **Deterioro físico** | | | | **Dolor:** | |
| --- | --- | --- | --- | --- | --- |
|  | 1 Ninguna incapacidad (EA por prolongar la estancia hospitalaria) | | |  | 1. Sin dolor |
|  | 2 Leve incapacidad social | | |  | 2. Dolor leve |
|  | 3 Severa incapacidad social y/o leve incapacidad laboral | | |  | 3. Dolor moderado |
|  | 4 Severa incapacidad laboral | | |  | 4. Dolor severo |
|  | 5 Incapacidad laboral absoluta | | |  | 5. NO SE PUEDE VALORAR |
|  | 6 Incapacidad para deambular salvo con ayuda de otros | | | | |
|  | 7 Encamado | | | | |
|  | 8 Inconsciente | | | | |
|  | 9 Fallecimiento (especifique la relación con el EA) | | | | |
|  |  |  | 9.1 No existe relación entre el EA y el fallecimiento | | |
|  |  |  | 9.2 El EA está relacionado con el fallecimiento | | |
|  |  |  | 9.3 El EA causó el fallecimiento | | |
|  | 10 NO SE PUEDE VALORAR | | | | |

**Valoración del grado de invalidez**

| **Trauma emocional** | |
| --- | --- |
|  | 0. DESCONOCIDO |
|  | 1 Sin trauma emocional |
|  | 2 Mínimo trauma emocional y / o recuperación en 1 mes |
|  | 3 Moderado trauma, recuperación entre 1 a 6 meses |
|  | 4 Moderado trauma, recuperación entre 6 meses a 1 año |
|  | 5 Trauma severo con efecto mayor a 1 año |
|  | 6 NO SE PUEDE VALORAR |

**B2.- REPERCUSIÓN DEL EA EN LA HOSPITALIZACIÓN**

¿Parte de la hospitalización, o toda, se debió al EA? (incluido el traslado a otro hospital)

|  | 1 No aumentó la estancia |
| --- | --- |
|  | 2 Parte de la estancia |
|  | 3 Causó reingreso (la estancia siguiente o la hospitalización estudiada fue provocada por un EA) |

| **Estime los días adicionales en el hospital causados por el EA:** |  | Días |
| --- | --- | --- |
| **De ellos, ¿cuántos días permaneció en la UCI?**  **:** |  | Días |

**B3.- PROCEDIMIENTOS ADICIONALES QUE REQUIRIÓ EL EA (**marque TODAS LAS CASILLAS QUE PROCEDA)

|  | La atención sanitaria no se vio afectada |
| --- | --- |
|  | Requirió un nivel más elevado de observación y monitorización (constantes vitales, efectos secundarios…) |
|  | Requirió una prueba adicional (radiografía, cultivo,…) u otro procedimiento |
|  | Tratamiento médico o rehabilitación (antibióticos, curas,…) |
|  | Intervención quirúrgica adicional |
|  | Intervención o tratamiento de soporte vital (intubación orotraqueal, RCP…) |

**B4.- GRAVEDAD DEL EA**

De acuerdo con la información anterior ¿cuál fue la gravedad del EA?

|  | 1 LEVE | Ocasiona lesión, pero NO prolonga estancia hospitalaria. |
| --- | --- | --- |
|  | 2 MODERADO | Ocasiona lesión, CON prolongación de la estancia hospitalaria de al menos 1 día. |
|  | 3 GRAVE | Ocasiona fallecimiento, incapacidad al alta, o requiere cirugía |

🡺 ***CONTINUAR EN EL MÓDULO C*** *(en el apartado que corresponda, según A4)*

**C0.- EA PREVIO A LA ADMISIÓN**

**(Incluyendo la atención en Urgencias, Atención Primaria, otros servicios u otros hospitales)**

**El EA ocurrió:**

|  | 1. En Urgencias en una atención previa |
| --- | --- |
|  | 2. En Atención Primaria o Domiciliaria en una atención previa |
|  | 3. En Consultas externas de atención especializada |
|  | 4. En el mismo servicio en una hospitalización previa |
|  | 5. En otro servicio del hospital en una hospitalización previa |
|  | 6. En otro hospital o área en una hospitalización previa |
|  | 7. En el propio domicilio del paciente (o en un centro sociosanitario). |

| ¿Conoce los factores de riesgo extrínseco presentes en el momento del EA? |  | Sí |  | **No** |
| --- | --- | --- | --- | --- |

**Si es así, indique las opciones que crea oportunas**

|  | 1 Sonda urinaria abierta |  | 8 Catéter umbilical (en arteria) |
| --- | --- | --- | --- |
|  | 2 Sonda urinaria cerrada |  | 9 Nutrición parenteral |
|  | 3 Catéter venoso periférico |  | 10 Nutrición enteral |
|  | 4 Catéter arterial |  | 11 Sonda Nasogástrica |
|  | 5 Catéter central de inserción periférica |  | 12 Traqueostomía |
|  | 6 Catéter venoso central |  | 13 Ventilación mecánica |
|  | 7 Catéter umbilical (en vena) |  | 14 Terapia inmunosupresora |

**C1.- EA EN LOS CUIDADOS EN EL MOMENTO DE ADMISIÓN A LA PLANTA**

**El EA ocurrió:**

|  | 1. En Urgencias u observación, antes de la admisión a planta |
| --- | --- |
|  | 2. Durante la valoración inicial en planta |
|  | 3. Durante la valoración preoperatoria |
|  | 4. Durante el proceso de hospitalización |

**C2.- EA DURANTE UN PROCEDIMIENTO**

**(incluyendo operaciones** **quirúrgicas, anestesia, manipulación de fracturas, procedimientos invasivos, endoscópicos, radiológicos)**

**El EA ocurrió:**

|  | 1. Durante la preparación previa del paciente para el procedimiento |
| --- | --- |
|  | 2. Justo antes de la realización del procedimiento |
|  | 3. Durante la realización del procedimiento |
|  | 4. Al finalizar el procedimiento |

**C3.- EA DURANTE LA ASISTENCIA INMEDIATA AL PROCEDIMIENTO, EN REANIMACIÓN O EN CUIDADOS INTENSIVOS**

**El EA ocurrió:**

|  | 1. Durante los cuidados inmediatamente posteriores al procedimiento (durante su permanencia en el área de despertar) |
| --- | --- |
|  |
|  | 2. Durante los cuidados en reanimación/sala de alta dependencia |
|  | 3. Durante los cuidados en la unidad de cuidados intensivos |

**C4.- EA DURANTE LA ASISTENCIA EN SALA**

**El EA ocurrió:**

|  | 1 Durante los cuidados postoperatorios (incluyendo postparto) |
| --- | --- |
|  | 2 Durante la administración de tratamiento médico (no quirúrgico) |
|  | 3 Durante la rehabilitación |
|  | 4 Durante la movilización del paciente |
|  | 5 Durante la realización de cualquier otro procedimiento de enfermería (Considerar C2) |
|  | 6 Durante el traslado del paciente |
|  | 7 Durante un periodo sin vigilancia directa (por la noche, estando el paciente solo, etc.) |
|  | 8 Otro (especifique) ______________________________________________________ |

**C5.- EA EN EL PROCESO DEL ALTA (de la hospitalización a estudio)**

**El EA ocurrió:**

|  | 1. Durante la valoración de la idoneidad del proceso del alta |
| --- | --- |
|  | 2. Durante la planificación de los cuidados posteriores al alta (plan) |
|  | 3. Durante la coordinación con otros niveles asistenciales |
|  | 4. Durante el asesoramiento / información al alta |
|  | 5. Durante el traslado al alta |

**C: NATURALEZA DEL PROBLEMA PRINCIPAL**

**¿Cuál fue la naturaleza del problema principal en esta fase de la asistencia?**

(Indique TODAS LAS OPCIONES que crea oportunas)

|  | 1 Error de diagnóstico o de identificación | ***🡺 D1*** |
| --- | --- | --- |
|  |  |  |
|  | 2 Fallo en la supervisión / registro / valoración clínica  (incluyendo accesibilidad a los resultados de las pruebas) | ***🡺 D2*** |
|  |
|  | 3 Cuidados de enfermería o de auxiliar  (úlceras por presión, caídas o problemas con drenajes, catéteres o sondaje) | ***🡺 D3*** |
|  |
|  |  |  |
|  | 4 Control de la infección relacionada con los cuidados | ***🡺 D4*** |
|  |  |  |
|  | 5 Problemas técnicos relacionados con un procedimiento  (incluyendo procedimientos de enfermería o diagnósticos) | ***🡺 D5*** |
|  |
|  |  |  |
|  | 6 Error de medicación o problemas en la administración de fluidos o sangre. | ***🡺 D6*** |
|  |
|  |  |  |
|  | 7 Otros Especifique ________________________________________ |  |

*Completar tantos módulos D como se haya especificado.*

🡺 ***CONTINUAR EN EL MÓDULO D***

*(en el/los apartado(s) indicados en la pregunta anterior:* ***D1****,* ***D2****,* ***D3****,* ***D4****,* ***D5*** *y/o* ***D6****)*

**D1.- EA RELACIONADO CON UN ERROR DIAGNÓSTICO O DE IDENTIFICACIÓN**

| ¿Ocurrió el EA por un error en la identificación del paciente? |  | Sí |  | No |
| --- | --- | --- | --- | --- |

En caso afirmativo, especifique (Señale todas las oportunas)

|  | 1 No existen medidas adecuadas para la identificación del paciente |
| --- | --- |
|  | 2 Las medidas no se implementaron |
|  | 3 Las medidas no son adecuadas (ausencia de segundo apellido, DNI, NHC, ...) |
|  | 4 Hubo problemas en la aplicación de las medidas (nombre ilegible, etc). |
|  | 5 No se comprobó la identidad del paciente |
|  | 6 Otros (especifique) ___________________________________________________________ |

| ¿Ocurrió el EA por un error en el diagnóstico? |  | Sí |  | No |
| --- | --- | --- | --- | --- |

En caso afirmativo, detalle:

|  |
| --- |

**Indique qué no se reconoció o valoró suficientemente:**

|  | 1 Motivo del ingreso o consulta del paciente |
| --- | --- |
|  | 2 Alergias a medicamentos o a productos sanitarios |
|  | 3 Hipertensión arterial o sus complicaciones |
|  | 4 Diabetes mellitus o sus complicaciones (pie diabético, nefropatía,…) |
|  | 5 Embarazo o sus complicaciones |
|  | 6 Antecedentes de IAM, AVC o ICC |
|  | 7 Obesidad, sobrepeso o sus complicaciones |
|  | 8 Cualquier complicación en el curso de la enfermedad del paciente |
|  | 9 Otros (especifique) ___________________________________________________________ |

**Factores contribuyentes al error diagnóstico** (señale todas las que crea oportunas).

|  | 1 Fallo para realizar una adecuada anamnesis |
| --- | --- |
|  | 2 Fallo para realizar un examen físico satisfactorio |
|  | 3 Fallo en la indicación de las pruebas pertinentes |
|  | 4 La prueba se realizó incorrectamente (en complicaciones de procedimientos invasivos, considerar D5) |
|  | 5 La prueba se informó incorrectamente |
|  | 6 Fallo en recibir el informe |
|  | 7 Fallo en actuar tras conocer los resultados de las pruebas o exploraciones |
|  | 8 Fallo en sacar conclusiones razonables / sensatas o hacer un diagnóstico diferencial |
|  | 9 Fallo para obtener una opinión de experto de: (especifique) |
|  | 10 Opinión experta incorrecta |
|  | 11 Otros (especifique) ___________________________________________________________ |

| ¿Ocurrió el EA por un retraso en el diagnóstico? |  | Sí |  | No |
| --- | --- | --- | --- | --- |

En caso afirmativo, especifique:

|  | 1 Demora en la citación en AP |
| --- | --- |
|  | 2 Demora en la derivación a otro especialista |
|  | 3 Demora en la citación en Consultas de Atención Especializada |
|  | 4 Demora en la atención en Urgencias |
|  | 5 Demora en el ingreso del paciente |
|  | 6 Demora en el traslado a una unidad de cuidados especiales |
|  | 7 Demora en la realización de una técnica diagnóstica |
|  | 8 Demora en la recepción de los resultados de la técnica diagnóstica |
|  | 9 Demora en la derivación al alta del paciente |
|  | 10 Otros (especifique) ___________________________________________________________ |

Estime el tiempo de la demora: _____ días

_____ horas

**D2.- EA DERIVADO DE UN FALLO EN LA SUPERVISIÓN / REGISTRO / VALORACIÓN CLÍNICA**

| ¿Ocurrió el EA por problemas en la monitorización / observación del paciente? |  | Sí |  | No |
| --- | --- | --- | --- | --- |

En caso afirmativo, detalle:

|  |
| --- |

**El control inadecuado se debió a un fallo en la monitorización de:**

|  | 1 Embarazo |
| --- | --- |
|  | 2 Glucemia |
|  | 3 Temperatura |
|  | 4 Tensión arterial |
|  | 5 Diuresis, función renal o alteración hidro-electrolítica |
|  | 6 Escaras, movilidad, estado de sondas y vías (considerar D3) |
|  | 7 Ritmo cardíaco o respiratorio, insuficiencia cardíaca, vascular o respiratoria (considerar D6) |
|  | 8 Estado nutricional, tolerancia, deposiciones |
|  | 9 Estado cognitivo, nivel de conciencia, orientación, agitación |
|  | 10 Evolución del proceso principal y aparición de complicaciones (considerar D1) |
|  | 11 Otros (especifique) ____________________________________________________ |

| ¿Ocurrió el EA por fallo en el registro de las observaciones / actividades? |  | Sí |  | No |
| --- | --- | --- | --- | --- |

En caso afirmativo, detalle:

|  |
| --- |

**¿En qué proceso fue poco satisfactorio el registro?**

|  | 1 Fallo a la hora de anotar las observaciones de rutina (Tª, PA, balance de fluidos, …) |
| --- | --- |
|  | 2 Fallo en el registro de la hoja de observaciones de enfermería |
|  | 3 Fallo en el registro de la hoja de evolución médica |
|  | 4 Fallo a la hora de registrar el plan |
|  | 5 Fallo en el registro de las pruebas / exploraciones pedidas o pendientes |
|  | 6 Fallo en el registro de las interconsultas pedidas o pendientes |
|  | 7 Fallo en el registro de las hojas de procedimientos / anestesia |
|  | 8 Fallo en el registro del tratamiento (Considerar D6) |
|  | 9 Fallo en el registro en las derivaciones o informes de alta |
|  | 10 Otro (especifique) _______________________________________________________ |

**El fallo se debió a:**

|  | 1 Pérdida o no disponibilidad de la hoja de registro correspondiente |
| --- | --- |
|  | 2 No se cumplimentó el apartado adecuado |
|  | 3 Poca información o información no válida |
|  | 4 Problemas de legibilidad o del idioma |
|  | 5 Problemas con la accesibilidad al sistema informático |
|  | 6 Caída del servidor u otros problemas técnicos |
|  | 7 No disponibilidad de claves de acceso a la aplicación oportuna |
|  | 8 Otro (especifique) _______________________________________________________ |

**D3.- EA RELACIONADO CON LOS CUIDADOS DE ENFERMERÍA**

| ¿Fue el problema del paciente la aparición o el agravamiento de una UPP? |  | Sí |  | No |
| --- | --- | --- | --- | --- |

En caso afirmativo, especifique (SEÑALE TODAS LAS OPORTUNAS)

|  | 1 No existe una estrategia para la prevención de las UPP en el centro |
| --- | --- |
|  | 2 No se realizó la valoración del riesgo |
|  | 3 La valoración del riesgo no se hizo de forma adecuada o con la periodicidad pertinente |
|  | 4 No se identificaron las medidas preventivas acordes al riesgo |
|  | 5 No se pudo implementar la medida preventiva por no disponibilidad (p ej. colchones) |
|  | 6 La movilización del paciente no fue adecuada |
|  | 7 Los cuidados de la piel del paciente no fueron adecuados. |
|  | 8 Cualquier fallo estructural que impidiera una prevención adecuada (butacas, colchones) |
|  | 9 Otros (especifique) ___________________________________________________________ |

**De acuerdo a la situación más desfavorable, ¿qué riesgo tenía el paciente de desarrollar una UPP?**

|  | 1 Bajo (por ejemplo más de 14 puntos en la escala de Norton) |
| --- | --- |
|  | 2 Moderado (entre 12 y 14 puntos) |
|  | 3 Muy alto (entre 5 y 11 puntos) |

**¿Qué medidas preventivas se implementaron? Señale todas las oportunas.**

|  | 1 Ninguna |
| --- | --- |
|  | 2 Cambios posturales |
|  | 3 Protección de talones |
|  | 4 Reductores de presión en cama o silla |
|  | 5 Cuidados específicos de la piel |
|  | 6 Cuidados para el estado nutricional y de hidratación del paciente. |

| ¿Fue el problema del paciente una caída? |  | Sí |  | No |
| --- | --- | --- | --- | --- |

En caso afirmativo, especifique (SEÑALE TODAS LAS OPORTUNAS)

|  | 1 No existe una estrategia para la prevención de las caídas en el centro |
| --- | --- |
|  | 2 No se realizó la valoración del riesgo |
|  | 3 La valoración del riesgo no se hizo de forma adecuada o con la periodicidad pertinente. |
|  | 4 No se identificaron las medidas preventivas acordes al riesgo |
|  | 5 No se pudo implementar la medida preventiva por no disponibilidad (pej. barandillas) |
|  | 6 La sujeción del paciente no fue adecuada |
|  | 7 No se acudió a la llamada del paciente o su acompañante a tiempo |
|  | 8 Cualquier fallo estructural que impidiera una prevención adecuada (timbre, iluminación, freno) |
|  | 9 Otros (especifique) ___________________________________________________________ |

**De acuerdo a la situación más desfavorable, ¿qué riesgo tenía el paciente de caerse?**

|  | 1 Bajo |
| --- | --- |
|  | 2 Moderado (por ejemplo 1 o 2 en la escala Downton) |
|  | 3 Muy alto (por ejemplo > 2 en la escala de Downton) |

**¿Qué medidas preventivas se implementaron? Señale todas las oportunas.**

|  | 1 Ninguna |
| --- | --- |
|  | 2 Accesibilidad, eliminación de obstáculos |
|  | 3 Valoración adecuada de efectos secundarios de la medicación (sedación, estupor) |
|  | 4 Inmovilización o sujeción mecánica |
|  | 5 Barandillas y otros apoyos estructurales |
|  | 6 Uso de bastón, andador o silla de ruedas |

| ¿Se relacionó el problema con el cuidado de cateterismos / drenaje / sondajes? |  | Sí |  | No |
| --- | --- | --- | --- | --- |

En caso afirmativo, especifique (señale todas las oportunas)

|  | 1 No existe una estrategia para la prevención de problemas relacionados con cateterismos |
| --- | --- |
|  | 2 No se realizó la valoración del riesgo |
|  | 3 La valoración del riesgo no se hizo de forma adecuada o con la periodicidad pertinente |
|  | 4 No se identificaron las medidas preventivas acordes al riesgo |
|  | 5 No se pudo implementar la medida preventiva por no disponibilidad (ej. conexiones del sistema) |
|  | 6 La sujeción de la sonda / catéter no fue adecuada |
|  | 7 No se valoró la oportunidad de la retirada del sondaje / vía (ej., pasar medicación a Vía Oral) |
|  | 8 Cualquier fallo estructural que impidiera una prevención adecuada |
|  | 9 Otros (especifique) ___________________________________________________________ |

**¿Qué riesgo había de que el paciente tuviera un problema con el sondaje, catéter o drenaje?**

|  | 1 Bajo |
| --- | --- |
|  | 2 Moderado |
|  | 3 Muy alto (por ejemplo en administración de amiodarona – Considerar D6) |

**¿Qué medidas preventivas se implementaron? Señale todas las oportunas.**

|  | 1 Ninguna |
| --- | --- |
|  | 2 Inserción aséptica |
|  | 3 Valoración adecuada de la necesidad de sedación o tratamiento farmacológico para la agitación |
|  | 4 Inmovilización o sujeción mecánica |
|  | 5 Recambio periódico de acuerdo al protocolo local o valoración de la necesidad del mismo |
|  | 6 Inserción en vía preferente (pej, basílica o subclavia para CVP) |

**D4.- EA RELACIONADOS CON UN FALLO EN LA PREVENCIÓN / CONTROL DE LA INFECCIÓN**

¿Cuál fue la localización de la infección?

**(Si el paciente presenta más de una localización, considerar completar un nuevo MRF2 completo)**

|  | 1 Sitio quirúrgico (considerar D5) |  | 8 Piel y partes blandas |
| --- | --- | --- | --- |
|  | 2 Tracto urinario |  | 9 Osteoarticular |
|  | 3 Vías respiratorias |  | 10 Ojos, nariz, boca |
|  | 4 Neumonía |  | 11 Sistema nervioso central |
|  | 5 Tuberculosis |  | 12 Endocarditis |
|  | 6 Bacteriemia o sepsis |  | 13 Sistémica (incluyendo VIH y hepatitis) |
|  | 7 Tubo digestivo |  | 14 Otras: __________________________ |

¿Cómo ha sido el diagnóstico de la infección? Indique los microorganismos implicados

|  | 1 Clínico |  | 1__________________________________ |
| --- | --- | --- | --- |
|  | 2 Cultivo positivo |  | 2__________________________________ |
|  | 3 Serología |  | 3__________________________________ |
|  | 4 Otros métodos diagnósticos |  | 4__________________________________ |
|  | 5 No fue diagnosticada por el equipo asistencial |  | 5__________________________________ |

En el caso en que se trate de una infección asociada a la asistencia, indique:

|  | 1 No existe una estrategia específica para la prevención en esta localización |
| --- | --- |
|  | 2 No se realizó la valoración del riesgo |
|  | 3 La valoración del riesgo no se hizo de forma adecuada o con la periodicidad pertinente |
|  | 4 No se identificaron las medidas preventivas acordes al riesgo |
|  | 5 No se implementaron todas las medidas que constituyen el bundle para su prevención |
|  | 6 No se pudo implementar la medida preventiva por no disponibilidad |
|  | 7 Cualquier fallo estructural que impidiera una prevención adecuada |
|  | 8 Otros (especifique) ___________________________________________________________ |

¿Qué factores se asociaron con la infección? Señale todas las oportunas.

| Efecto secundario a fármacos (Considerar D6 incluso ante ausencia de profilaxis perioperatoria) | |
| --- | --- |
|  | Infección Inducida por antibióticos (C. Difficile) |
|  | Infección por hongos |
|  | Fármacos inmunosupresores |
| Cuerpo extraño (Considerar D3) | |
|  | Sonda urinaria |
|  | Catéter vascular |
|  | Traqueostomía, intubación o ventilación mecánica |
|  | Drenaje |
|  | Otro (especifique) ______________________________________________________________ |
| Factores estructurales y del entorno | |
|  | Cloración y tratamiento del agua |
|  | Bioseguridad en quirófano |
|  | Esterilización / desinfección |
|  | Precauciones de aislamiento |

¿Qué medidas preventivas se implementaron? Señale todas las oportunas.

|  | 1 Ninguna |
| --- | --- |
|  | 2 Profilaxis antibiótica (pej. para la endocarditis) |
|  | 3 Asepsia y antisepsia |
|  | 4 Precauciones de aislamiento (si se trata de una transmisión cruzada) |
|  | 5 Bundle completo para su localización |
|  | 6 Otras ______________________________________________________________________ |

**D5.- EA RELACIONADOS CON UN PROCEDIMIENTO**

| ¿Se trata del procedimiento indicado en la Guía de Cribado? |  | Sí |  | No |
| --- | --- | --- | --- | --- |

Especifique con qué procedimiento se corresponde el EA

|  | 1 Intervención quirúrgica convencional o laparoscópica |
| --- | --- |
|  | 2 Cirugía sin ingreso______________ |
|  | 3 Cirugía mayor ambulatoria |
|  | 4 Cirugía menor |
|  | 5 Radiología intervencionista |
|  | 6 Hemodinámica / angioplastia |
|  | 7 Procedimientos diagnósticos invasivos (colonoscopia, broncoscopia, punción lumbar,…) |
|  | 8 Biopsia (incluyendo los procedimientos del apartado anterior) |
|  | 9 Inserción de catéter o sondaje |
|  | 10 Manipulación de fractura |
|  | 11 Otros _______________________________________________________________ |

| ¿Ocurrió el EA por un retraso en la realización del procedimiento? |  | Sí |  | No |
| --- | --- | --- | --- | --- |

En caso afirmativo, especifique:

|  | 1 Demora en la citación en AP |
| --- | --- |
|  | 2 Demora en la derivación a otro especialista |
|  | 3 Demora en la citación en Consultas de Atención Especializada |
|  | 4 Demora en la atención en Urgencias |
|  | 5 Demora en el ingreso del paciente |
|  | 6 Demora en el traslado a la unidad en la que se realiza el procedimiento |
|  | 7 Problemas en la programación del procedimiento (incluyendo suspensión del procedimiento) |
|  | 8 Demora en la preparación del paciente para el procedimiento (ayunas, anticoagulación) |
|  | 9 Demora en la realización del propio procedimiento |
|  | 10 Otros _______________________________________________________________ |

Estime el tiempo de la demora: _____ días u _____ horas

| ¿Ocurrió el EA por un problema relacionado con el procedimiento? |  | Sí |  | No |
| --- | --- | --- | --- | --- |

En caso afirmativo, dé detalles

|  |
| --- |

Por favor, especifique:

|  | 1 No existe una estrategia que incluya un listado de verificación para este procedimiento |
| --- | --- |
|  | 2 No se realizó el listado de verificación |
|  | 3 Alguno de los requisitos del listado de verificación no se cumplió |
|  | 4 No se identificaron las medidas adecuadas al riesgo (problemas en la intubación, obesidad,…) |
|  | 5 No se pudo implementar la medida por no disponibilidad (ej. visualización de imágenes en quir) |
|  | 6 Cualquier fallo estructural que impidiera una actuación adecuada |
|  | 7 Otros (especifique) ___________________________________________________________ |

**Factores relacionados con el problema en el procedimiento** (señale todas las que crea oportunas).

|  | 1 Fallo para realizar una adecuada anamnesis |
| --- | --- |
|  | 2 Fallo para realizar un examen físico satisfactorio |
|  | 3 Fallo en la indicación del procedimiento o procedimiento inadecuado |
|  | 4 Preparación inadecuada del paciente antes del procedimiento (ayunas, rasurado, anticoagulación) |
|  | 5 Identificación errónea del paciente (considerar D1) o de la localización quirúrgica |
|  | 6 Incidente en la anestesia: intubación, reacción al agente anestésico (considerar D6) |
|  | 7 Problema con el aparataje, dispositivos o instrumental |
|  | 8 Dificultad en la delimitación anatómica, presencia de adherencias o no visualización |
|  | 9 El procedimiento se realizó incorrectamente |
|  | 10 Ocurrió un incidente crítico durante el procedimiento |
|  | 11 Monitorización inadecuada durante el procedimiento |
|  | 12 Vigilancia inadecuada posterior al procedimiento |
|  | 13 Curas o tratamiento posterior inadecuado (considerar D2 en problemas con los drenajes) |
|  | 14 Otros (especifique) ____________________________________________________________ |

**D6.- EA RELACIONADO CON MEDICAMENTOS O FLUIDOS (incluyendo SANGRE)**

**¿Cómo se administró el medicamento / fluido?**

|  | 1 Intravenoso |  | 4 oral |  | 7 tópico |
| --- | --- | --- | --- | --- | --- |
|  | 2 Intramuscular |  | 5 sublingual |  | 8 rectal |
|  | 3 Subcutáneo |  | 6 Intratecal |  | 9 Otro ____________________ |

¿Qué medicamento fue?

|  | 1 antineoplásico |  | 8 cardiovascular |  | 15 antidepresivo |
| --- | --- | --- | --- | --- | --- |
|  | 2 inmunosupresor |  | 9 vasodilatador |  | 16 antiepiléctico |
|  | 3 antibiótico |  | 10 diurético |  | 17 sedante o hipnótico |
|  | 4 analgésico |  | 11 IECAS o ARA-II |  | 18 narcóticos (p.e.morfina/petidina) |
|  | 5 antiinflamatorio |  | 12 anticoagulante |  | 19 antipsicótico |
|  | 6 broncodilatador |  | 13 antidiabético |  | 20 protector gástrico |
|  | 7 Potasio |  | 14 sangre o expansores |  | 21 Otros ___________________ |

**Nombre del fármaco**

|  |
| --- |

| ¿Ocurrió el EA por un retraso en el tratamiento? |  | Sí |  | No |
| --- | --- | --- | --- | --- |

En caso afirmativo, especifique:

|  | 1 Demora en la citación en AP |
| --- | --- |
|  | 2 Demora en la derivación a otro especialista |
|  | 3 Demora en la citación en Consultas de Atención Especializada |
|  | 4 Demora en la atención en Urgencias |
|  | 5 Demora en el ingreso del paciente |
|  | 6 Demora en la recepción de pruebas de indicación / monitorización del tratamiento (Considerar D1) |
|  | 7 Demora a la hora de recibir las órdenes de tratamiento oportunas |
|  | 8 Demora en la organización para la administración del tratamiento |
|  | 9 Otros _______________________________________________________________ |

Estime el tiempo de la demora: _____ días o _____ horas

| ¿Ocurrió el EA por una reacción adversa medicamentosa (RAM)? |  | Sí |  | No |
| --- | --- | --- | --- | --- |

| ¿Ocurrió el EA por un error de medicación? |  | Sí |  | No |
| --- | --- | --- | --- | --- |

**Indique qué no se trató o valoró suficientemente:**

|  | 1 Motivo del ingreso o consulta del paciente (incluye indicación de IECA/ARA-II en Sd Coronario Agudo) |
| --- | --- |
|  | 2 Alergias a medicamentos o a productos sanitarios |
|  | 3 Hipertensión arterial o sus complicaciones |
|  | 4 Diabetes mellitus o sus complicaciones (incluye indicación de IECA/ARA-II en proteinuria o microalb.) |
|  | 5 Embarazo o sus complicaciones |
|  | 6 Antecedentes de IAM, AVC o ICC |
|  | 7 Obesidad, sobrepeso o sus complicaciones |
|  | 8 Cualquier posible complicación (incluye prevención con anticoagulantes o protectores gástricos) |
|  | 9 Otros (especifique) ___________________________________________________________ |

**Factores relacionados con el error de medicación** (señale todas las que crea oportunas).

|  | 1 No prescripción estando indicado |
| --- | --- |
|  | 2 Indicación incorrecta (Considerar D1 en diagnóstico o paciente erróneos y D2 en error de valoración) |
|  | 3 Existe una alternativa más eficaz o más segura |
|  | 4 Dosis inadecuada |
|  | 5 Frecuencia de administración incorrecta o insuficiente |
|  | 6 Duración del tratamiento incorrecta (pej. profilaxis perioperatoria) |
|  | 7 Error en el registro (Considerar D2 si letra ilegible o no registro en el libro de enfermería) |
|  | 8 Error en la preparación o manipulación del tratamiento |
|  | 9 Vía de administración inadecuada |
|  | 10 Otro error en la administración del tratamiento |
|  | 11 Monitorización insuficiente de la acción del tratamiento o sus efectos secundarios |
|  | 12 Interacción farmacológica |
|  | 13 Duplicidad o error en la conciliación de la medicación |
|  | 14 Otros (especifique) ___________________________________________________________ |

🡺 ***CONTINUAR EN EL MÓDULO E***

**E1.- INDIQUE LOS FACTORES QUE CONTRIBUYERON AL INCIDENTE / EVENTO ADVERSO**

**Elija como máximo 10 de los siguientes factores y adjudique a cada uno de ellos un porcentaje según su contribución en la ocurrencia del EA (suma total 100%)**

Peso Factores Peso Factores

| **Factores del paciente o sus familiares** | | **Factores de equipamiento y recursos** | |
| --- | --- | --- | --- |
|  | Comorbilidad o complejidad del cuadro |  | Acceso / disponibilidad HC informatizada |
|  | Cultura / creencia que dificulte el manejo |  | Problemas de mantenimiento de equipos |
|  | Déficit cognitivo o trastorno mental |  | Diseño inadecuado de recursos (timbre,…) |
|  | Actitud no cooperativa (incumplimiento) |  | Almacenamiento / accesibilidad inadecuado |
|  | Idioma diferente o no comprensible |  | No disponibilidad del producto / fármaco |
|  | Mala comunicación con los profesionales |  | Etiquetado incorrecto |
|  | Mala comunicación con los familiares |  | Envase o nombre parecido |
|  | Bajo nivel económico |  | Caducidad |
|  | Ausencia de familiares o redes de apoyo |  | Equipamiento / recurso nuevo |
|  |  |  | Equipamiento no estándar |
| **Factores individuales del profesional sanitario** | | **Factores del entorno de trabajo** | |
|  | Salud, discapacidad, estrés o fatiga |  | Seguridad y accesos a zonas restringidas |
|  | Baja motivación |  | Entorno inadecuado (ruido, luz, temperatura) |
|  | Conocimientos o destrezas inadecuados |  | Entorno inadecuado (limpieza, camas, espacio) |
|  | Poca experiencia en el lugar de trabajo |  | Distracciones en el entorno |
|  | Desconocimiento de tareas o protocolos |  | Ratio inadecuado de personal / paciente |
|  | Supervisión inadecuada |  | Presión asistencial elevada |
|  | Formación inadecuada o insuficiente |  | Rotación excesiva de personal / inexperiencia |
|  | Actitud no cooperativa |  | Realización de tareas ajenas |
|  | Horario inadecuado |  | Fatiga ligada a los turnos de trabajo |
| **Factores de comunicación oral y escrita** | | **Factores del trabajo en equipo y liderazgo** | |
|  | Indicaciones verbales ambiguas |  | Las funciones no están claramente definidas |
|  | Uso incorrecto del lenguaje |  | No hay un liderazgo efectivo |
|  | Uso de un canal inadecuado |  | Ausencia de sistemas de evaluación / incentivos |
|  | Registros insuficientes o inadecuados |  | Conflicto entre los miembros del equipo |
|  | La información no llega a todo el equipo |  | Ausencia de mecanismos de apoyo ante el error |
|  | Lenguaje corporal inadecuado |  | No se promueve la cultura de seguridad |
| **Factores relacionados con la tarea** | | **Factores organizativos y de gestión** | |
|  | Ausencia de guías o protocolos |  | Cita o programación erróneas |
|  | Protocolo inadecuado u obsoleto |  | Lista de espera prolongada |
|  | Protocolo no conocido / incumplimiento |  | Error en la información sanitaria |
|  | Ausencia de verificación del proceso |  | Estructura organizativa insuficiente |
|  | Tarea demasiado compleja |  | Estructura asistencial insuficiente |

**E2.- VALORE LA POSIBILIDAD DE PREVENCIÓN DEL INCIDENTE / EVENTO ADVERSO**

Ayuda a la decisión:

| *¿Si el paciente hubiera sido atendido en otro centro o sistema sanitario, le hubiera ocurrido el EA?* | | | | | |
| --- | --- | --- | --- | --- | --- |
| *¿Identifica algo que se hiciera sin cumplir con los estándares de cuidado?* | | | | | |
| *¿Qué capacidad tiene el sistema de manejar la situación de riesgo?* | | | | | |
| A su juicio, ¿hay alguna evidencia de que el EA se podría haber evitado? | |  | Sí |  | No |

Valore en una escala de 6 puntos la evidencia de posibilidad de prevención.

|  | 1.- Ausencia de evidencia de posibilidad de prevención. |
| --- | --- |
|  | 2.- Mínima posibilidad de prevención. |
|  | 3.- Ligera posibilidad de prevención. |
|  | 4.- Moderada posibilidad de prevención. |
|  | 5.- Elevada posibilidad de prevención. |
|  | 6.- Total evidencia de posibilidad de prevención. |

**Describa brevemente la manera en que el I / EA podría haberse prevenido**

🡺 ***CONTINUAR EN EL MÓDULO D***
