# Supplementary material
Source: Elsevier journal article supplement (https://www.sciencedirect.com/science/article/pii/S260364792100035X)
Supplement: mmc2 [file S260364792100035X:mmc2.docx]

| **DATOS DEL INGRESO** | | | | |
| --- | --- | --- | --- | --- |
| **Código**  **Hospital:** | **Nº Hª CLÍNICA*:** | | | **Número de Caso**  **Web ESHMAD*:** |
| **Fecha del estudio*:** / / 2019 (*día/mes/año*) | | **Fecha de ingreso*:** ........./…........../….......... (*día/mes/año*) | | |
| **Especialidad de la planta*:** | | **Fecha de nacimiento:** ........./…........../….......... (*día/mes/año*) | | |
| **Sexo*:** O Mujer O Hombre | | |
| **Tipo de ingreso*:**  O Programado O Urgente | | **Diagnóstico Principal:** | | |
| **GRD** Diagnóstico: | **CIE-9/10** Diagnóstico: | |

| **Factores de riesgo asociados (INTRÍNSECOS)** | | | | | |
| --- | --- | --- | --- | --- | --- |
| **Coma:** | O Sí O No | **Inmunodeficiencia:** | O Sí O No | **Alteración de movilidad** | O Sí O No |
| **Insuficiencia renal:** | O Sí O No | **Neutropenia:** | O Sí O No | **Déficits sensoriales** | O Sí O No |
| **Diabetes:** | O Sí O No | **Cirrosis hepática:** | O Sí O No | **Obesidad** | O Sí O No |
| **Neoplasia:** | O Sí O No | **Hipoalbuminemia:** | O Sí O No | **Enf. Cardiovasculares:** | O Sí O No |
| **Enfermedad pulmonar crónica:** | O Sí O No | **Úlcera por presión:** | O Sí O No | **Tabaquismo activo** | O Sí O No |

| **Factores de riesgo asociados (EXTRÍNSECOS)** | | | | | | |
| --- | --- | --- | --- | --- | --- | --- |
| **INTERVENCIÓN QUIRÚRGICA*:**  O NO O Programada O Urgente | | **DISPOSITIVOS INVASIVOS:** | | | | |
| **Fecha de la cirugía**: …...../........./……....(día/mes/año) | **Tipo de cirugía:**  O Endoscópica / Laparoscópica  O No Endoscópica | **Catéter vascular periférico:** | | O Sí | | O No |
| **Clasificación ASA**: ……....… | **Catéter vascular central:** | | O Sí | | O No |
| **Grado de contaminación** de cirugía:................... | **Catéter urinario:** | O Sí | | O No | |
| **Duración (**en minutos): …………. | **Intubación:** | O Sí | | O No | |
| **CIE 9 Procedimiento**: ……………………. | **Nº fármacos en medicación actual:** |  | | | |

| **CRIBADO DE EVENTOS ADVERSOS:** *señalar 1 o más ítems + datos de interés* *(fecha, detalles que faciliten análisis posterior)* | |
| --- | --- |
|  | 1. Hospitalización previa relacionada y NO PREVISTA (últimos **12 meses** si<65 años // **6 meses si** ≥65 años): |
|  | 2. Traslado de una unidad de hospitalización general a otra de cuidados especiales: |
|  | 3. Traslado a / desde otro hospital: |
|  | 4. Tratamiento antineoplásico en los **6 meses previos** a la hospitalización: |
|  | 5. Cualquier **problema** relacionado con la medicación: |
|  | 6. Segunda **intervención quirúrgica** no prevista durante este ingreso: |
|  | 7. Algún daño o complicación relacionada con una **cirugía o procedimiento invasivo** previo: |
|  | 8. Déficit neurológico nuevo relacionado con **algún tipo de asistencia sanitaria:** |
|  | 9. IAM, ACVA o TEP **relacionado con procedimientos invasivos:** |
|  | 10. Parada cardiorrespiratoriao puntuación APGAR baja: |
|  | 11. Daño o complicación relacionados con **aborto, amniocentesis, parto o preparto**: |
|  | 12. Fiebre mayor de 38º Cel **día antes del alta** hospitalaria de ingreso previo: |
|  | 13. Signos o síntomas de infección relacionada con los cuidados: |
|  | 14 Traumatismo, accidente o caída durante la hospitalización: |
|  | 15. Otros problemas relacionados con los cuidados (úlceras, flebitis, etc.): |
|  | 16. Fallecimiento: |
|  | 17. Cartas o notas en Hª Clínica (incluida reclamación patrimonial) que sugieran litigio: |
|  | 18. Cualquier otro problema que sugiera un evento adverso (especificar): |

*****: Campos obligatoriosIAM (infarto agudo de miocardio), ACVA (accidente cerebro-vascular agudo) o TEP (tromboembolismo pulmonar)
